# Supplementary material for: Effective Mainstreaming of Agricultural Emissions into Climate Action Agenda: The Case of Institutions and Smallholder Dairy Production Systems, Western Kenya
Source: MDPI journal article supplement (doi:10.3390/atmos12111507), 2021-11-16
Supplement: s1 [file s1]

**Supplementary (SP1): Effect of output price variations on risk management at different supplementation**

**levels of basal diets on Gross Margin**

| Ration                |           | Levels of concentrate supplementation /Kg of basal diet and corresponding Cost (Kes/Kg) |       |       |       |       |
|-----------------------|-----------|-----------------------------------------------------------------------------------------|-------|-------|-------|-------|
|                       |           | 0.1                                                                                     | 0.2   | 0.3   | 0.4   | 0.5   |
| <b>MS+CSC+M</b>       | Prod.cost | 13.67                                                                                   | 20.34 | 18.50 | 23    | 27.5  |
|                       | MPc (33)  | 19.33                                                                                   | 19.33 | 14.5  | 10    | 5.5   |
|                       | MPfw (30) | 16.33                                                                                   | 9.66  | 11.5  | 7     | 2.5   |
|                       | MPfd (45) | 31.33                                                                                   | 24.66 | 26.5  | 22    | 17.5  |
|                       | MPpm (25) | 11.33                                                                                   | 4.66  | 7.50  | 2     | (2.5) |
| <b>MS+CSC+M+DES</b>   | Prod.cost | 13.92                                                                                   | 20.84 | Na    | Na    | Na    |
|                       | MPc (33)  | 19.08                                                                                   | 12.16 | Na    | Na    | Na    |
|                       | MPfw (30) | 16.08                                                                                   | 9.16  | Na    | Na    | Na    |
|                       | MPfd (45) | 31.08                                                                                   | 24.16 | Na    | Na    | Na    |
|                       | MPpm (25) | 11.08                                                                                   | 4.16  | Na    | Na    | Na    |
| <b>MS+CSC+M+CALLN</b> | Prod.cost | 13.82                                                                                   | 13.97 | Na    | Na    | Na    |
|                       | MPc (33)  | 19.18                                                                                   | 19.03 | Na    | Na    | Na    |
|                       | MPfw (30) | 16.18                                                                                   | 16.03 | Na    | Na    | Na    |
|                       | MPfd (45) | 31.18                                                                                   | 31.03 | Na    | Na    | Na    |
|                       | MPpm (25) | 11.18                                                                                   | 11.03 | Na    | Na    | Na''  |
| <b>MS+CSC+M+SESB</b>  | Prod.cost | 13.82                                                                                   | 13.97 | Na    | Na    | Na    |
|                       | MPc (33)  | 19.18                                                                                   | 19.03 | Na    | Na    | Na    |
|                       | MPfw (30) | 16.18                                                                                   | 16.03 | Na    | Na    | Na    |
|                       | MPfd (45) | 31.18                                                                                   | 31.03 | Na    | Na    | Na    |
|                       | MPpm (25) | 11.18                                                                                   | 11.03 | Na    | Na    | Na    |
| <b>MS+CSC+M+SPV</b>   | Prod.cost | 13.97                                                                                   | 14.27 | Na    | Na    | Na    |
|                       | MPc (33)  | 19.03                                                                                   | 18.73 | Na    | Na    | Na    |
|                       | MPfw (30) | 16.03                                                                                   | 15.73 | Na    | Na    | Na    |
|                       | MPfd (45) | 31.03                                                                                   | 30.73 | Na    | Na    | Na    |
|                       | MPpm (25) | 11.03                                                                                   | 10.73 | Na    | Na    | Na    |
| <b>STC+CSC</b>        | Prod.cost | 20.3                                                                                    | 23.6  | 26.9  | 30.2  | 33.5  |
|                       | MPc (33)  | 12.7                                                                                    | 9.4   | 6.1   | 2.8   | (0.5) |
|                       | MPfw (30) | 9.7                                                                                     | 6.4   | 3.1   | 0.2   | (3.5) |
|                       | MPfd (45) | 24.7                                                                                    | 21.4  | 18.1  | 15.2  | 11.5  |
|                       | MPpm (25) | 4.7                                                                                     | 1.4   | (1.9) | (4.8) | (8.5) |
| <b>Napier + CSC</b>   | Cost(DS)  | 23                                                                                      | 26    | 29    | 32    | 35    |
|                       | Cost(Ws)  | 18.5                                                                                    | 22    | 25.5  | 31    | 32.50 |
|                       | MPc (33)  | 14.5                                                                                    | 11    | 7.5   | 2     | (0.5) |
|                       | MPfw (30) | 11.5                                                                                    | 8     | 4.5   | (1)   | (3.5) |
|                       | MPfd (45) | 22                                                                                      | 19    | 16    | 13    | 10    |
| <b>MS+FM</b>          | MPpm (25) | 2                                                                                       | (1)   | (4)   | (7)   | (10)  |
|                       | Cost(DS)  | 12                                                                                      | 19    | 26    | 33    | 40    |
|                       | MPc (33)  | 14.5                                                                                    | 11    | 7.5   | 2     | (0.5) |
|                       | MPfw (30) | 11.5                                                                                    | 8     | 4.5   | (1)   | (3.5) |
|                       | MPfd (45) | 22                                                                                      | 19    | 16    | 13    | 10    |
| <b>Napier+FM</b>      | MPpm (25) | 2                                                                                       | (1)   | (4)   | (7)   | (10)  |
|                       | Cost (DS) | 25.5                                                                                    | 31    | 36.5  | 38    | 47.5  |
|                       | Cost (WS) | 21                                                                                      | 27    | 33    | 36    | 45    |
|                       | MPc (33)  | 14.5                                                                                    | 11    | 7.5   | 2     | (0.5) |
